# Supplementary material for: Oral Administration of Microencapsulated B. Longum BAA-999 and Lycopene Modulates IGF-1/IGF-1R/IGFBP3 Protein Expressions in a Colorectal Murine Model
Source: PubMed Central journal article supplement (PMC6747182; doi:10.3390/ijms20174275), 2019-08-31
Supplement: ijms-20-04275-s001.pdf [file ijms-20-04275-s001.pdf]

**Table 1.** Body weight, body weight gain, pH,  $\beta$ -GA and population of *Bifidobacterium longum* during 16 weeks.

| Groups | Week                    | Body weight (g) |              |    | Body weight gain (g) |             |    | pH          |             |    | $\beta$ -GA <sup>1</sup> |             |    | Viable BF <sup>2</sup> |             |    |
|--------|-------------------------|-----------------|--------------|----|----------------------|-------------|----|-------------|-------------|----|--------------------------|-------------|----|------------------------|-------------|----|
| Normal | 1                       | 31.15 ± 0.92    | e            | A  | 0.00 ± 0.00          |             |    | 7.29 ± 0.30 | a           | A  | 5.67 ± 0.07              | a           | A  | 5.87 ± 0.02            | a           | A  |
|        | 2                       | 32.76 ± 0.72    | de           | A  | 1.50 ± 0.17          | e           | C  | 7.40 ± 0.08 | a           | A  | 5.09 ± 0.18              | a           | A  | 5.87 ± 0.02            | a           | A  |
|        | 3                       | 32.91 ± 0.84    | cde          | A  | 1.70 ± 0.45          | e           | B  | 7.23 ± 0.07 | a           | A  | 5.26 ± 0.44              | a           | A  | 5.85 ± 0.05            | a           | A  |
|        | 4                       | 33.60 ± 0.63    | bcde         | A  | 2.30 ± 0.30          | de          | B  | 7.13 ± 0.03 | a           | A  | 5.33 ± 0.30              | a           | AB | 5.91 ± 0.02            | a           | AB |
|        | 5                       | 35.72 ± 1.04    | abcd         | A  | 4.60 ± 0.56          | cde         | B  | 7.33 ± 0.21 | a           | A  | 5.56 ± 0.01              | a           | CD | 5.94 ± 0.03            | a           | A  |
|        | 6                       | 36.54 ± 0.82    | abcd         | A  | 5.30 ± 0.58          | bcd         | B  | 7.23 ± 0.07 | a           | C  | 5.12 ± 0.27              | a           | CD | 4.65 ± 0.04            | a           | A  |
|        | 7                       | 37.25 ± 0.79    | abc          | A  | 6.00 ± 0.73          | abc         | A  | 7.28 ± 0.04 | a           | B  | 5.55 ± 0.01              | a           | D  | 4.42 ± 0.02            | a           | AB |
|        | 9                       | 37.89 ± 0.68    | ab           | A  | 6.60 ± 0.86          | abc         | B  | 7.24 ± 0.03 | a           | A  | 5.33 ± 0.15              | a           | B  | 4.29 ± 0.08            | ab          | A  |
|        | 10                      | 38.48 ± 0.72    | a            | AB | 7.20 ± 0.76          | abc         | B  | 7.21 ± 0.03 | a           | B  | 4.87 ± 0.16              | a           | BC | 4.38 ± 0.10            | a           | BC |
|        | 11                      | 39.04 ± 0.81    | a            | A  | 7.80 ± 0.77          | abc         | A  | 7.34 ± 0.08 | a           | A  | 5.02 ± 0.14              | a           | CD | 4.35 ± 0.08            | ab          | A  |
|        | 12                      | 37.51 ± 1.07    | ab           | A  | 6.40 ± 0.60          | abc         | B  | 7.20 ± 0.04 | a           | A  | 4.90 ± 0.12              | a           | CD | 4.49 ± 0.10            | a           | A  |
|        | 13                      | 39.10 ± 0.92    | a            | A  | 7.90 ± 0.71          | ab          | B  | 7.10 ± 0.03 | a           | A  | 5.71 ± 0.06              | a           | C  | 4.19 ± 0.09            | b           | A  |
|        | 14                      | 39.72 ± 1.09    | a            | A  | 8.60 ± 0.81          | a           | B  | 7.32 ± 0.09 | a           | A  | 5.70 ± 0.05              | a           | DE | 4.22 ± 0.01            | b           | A  |
|        | 15                      | 38.65 ± 1.03    | a            | A  | 7.50 ± 0.81          | abc         | B  | 7.35 ± 0.13 | a           | A  | 5.65 ± 0.04              | a           | D  | 4.53 ± 0.12            | a           | AB |
|        | 16                      | 39.56 ± 1.01    | a            | A  | 8.40 ± 0.79          | ab          | B  | 6.99 ± 0.10 | a           | DE | 5.72 ± 0.03              | a           | DE | 4.41 ± 0.10            | a           | AB |
|        | AOM +<br>DSS<br>control | 1               | 30.62 ± 0.54 | e  | A                    | 0.00 ± 0.00 |    |             | 7.24 ± 0.25 | b  | A                        | 5.40 ± 0.26 | ef | A                      | 5.72 ± 0.11 | a  |
| 2      |                         | 33.55 ± 0.43    | de           | A  | 2.90 ± 0.28          | e           | A  | 7.20 ± 0.08 | b           | A  | 5.09 ± 0.08              | f           | A  | 5.72 ± 0.11            | a           | A  |
| 3      |                         | 34.63 ± 0.52    | cd           | A  | 4.00 ± 0.49          | de          | A  | 7.20 ± 0.06 | b           | A  | 5.92 ± 0.25              | def         | A  | 5.86 ± 0.01            | a           | A  |
| 4      |                         | 35.28 ± 0.69    | cd           | A  | 4.70 ± 0.47          | de          | A  | 7.20 ± 0.10 | b           | A  | 5.39 ± 0.02              | ef          | AB | 5.90 ± 0.04            | a           | AB |
| 5      |                         | 36.53 ± 1.00    | bcd          | A  | 6.10 ± 0.66          | cd          | AB | 7.74 ± 0.04 | ab          | A  | 6.63 ± 0.17              | cd          | A  | 5.88 ± 0.00            | a           | A  |
| 6      |                         | 37.47 ± 0.70    | abc          | A  | 6.90 ± 0.55          | bcd         | AB | 7.85 ± 0.13 | a           | AB | 6.44 ± 0.20              | de          | A  | 4.58 ± 0.18            | b           | A  |
| 7      |                         | 39.36 ± 0.43    | ab           | A  | 8.70 ± 0.62          | abc         | A  | 7.98 ± 0.06 | a           | A  | 8.27 ± 0.12              | b           | A  | 3.70 ± 0.14            | c           | CD |
| 9      |                         | 40.66 ± 0.45    | a            | A  | 10.00 ± 0.49         | a           | A  | 7.78 ± 0.02 | ab          | A  | 8.21 ± 0.25              | b           | A  | 4.11 ± 0.12            | bc          | A  |



|  |    |              |      |    |              |      |     |             |     |     |             |       |     |             |     |     |
|--|----|--------------|------|----|--------------|------|-----|-------------|-----|-----|-------------|-------|-----|-------------|-----|-----|
|  | 7  | 38.83 ± 0.96 | ab   | A  | 8.88 ± 0.48  | bc   | A   | 7.69 ± 0.23 | abc | AB  | 5.08 ± 0.45 | cd    | D   | 4.32 ± 0.15 | bc  | ABC |
|  | 9  | 40.04 ± 0.80 | a    | A  | 10.00 ± 0.53 | ab   | A   | 7.73 ± 0.28 | abc | A   | 4.80 ± 0.39 | d     | BC  | 4.46 ± 0.15 | bc  | A   |
|  | 10 | 40.07 ± 1.15 | a    | AB | 10.13 ± 0.81 | ab   | AB  | 7.63 ± 0.22 | abc | AB  | 5.31 ± 0.38 | bcd   | B   | 4.35 ± 0.00 | bc  | BC  |
|  | 11 | 40.73 ± 1.31 | a    | A  | 10.75 ± 0.84 | ab   | A   | 7.53 ± 0.13 | abc | A   | 5.98 ± 0.23 | abcd  | BC  | 4.28 ± 0.07 | c   | A   |
|  | 12 | 40.77 ± 0.72 | a    | A  | 10.75 ± 0.31 | ab   | A   | 8.01 ± 0.10 | a   | A   | 6.24 ± 0.37 | abcd  | B   | 4.41 ± 0.06 | bc  | AB  |
|  | 13 | 41.60 ± 0.86 | a    | A  | 11.50 ± 0.57 | a    | A   | 7.44 ± 0.12 | abc | A   | 6.42 ± 0.16 | abcd  | B   | 4.42 ± 0.06 | bc  | A   |
|  | 14 | 40.78 ± 0.69 | a    | A  | 10.75 ± 0.37 | ab   | AB  | 7.11 ± 0.29 | abc | A   | 7.09 ± 0.05 | a     | BC  | 4.36 ± 0.04 | bc  | A   |
|  | 15 | 41.90 ± 0.79 | a    | A  | 11.88 ± 0.48 | a    | A   | 7.03 ± 0.28 | bc  | A   | 6.89 ± 0.25 | ab    | BC  | 4.39 ± 0.13 | bc  | AB  |
|  | 16 | 41.71 ± 0.97 | a    | A  | 11.63 ± 0.65 | a    | AB  | 7.07 ± 0.20 | bc  | C   | 6.71 ± 0.26 | abc   | C   | 4.51 ± 0.07 | bc  | A   |
|  | 1  | 29.81 ± 0.48 | g    | A  | 0.00 ± 0.00  |      |     | 7.17 ± 0.31 | ab  | A   | 5.82 ± 0.30 | a     | A   | 6.00 ± 0.19 | abc | A   |
|  | 2  | 31.50 ± 0.57 | fg   | A  | 1.63 ± 0.18  | g    | BC  | 7.22 ± 0.27 | ab  | A   | 5.67 ± 0.05 | ab    | A   | 6.42 ± 0.08 | a   | A   |
|  | 3  | 32.89 ± 0.74 | efg  | A  | 3.00 ± 0.33  | fg   | AB  | 7.06 ± 0.02 | ab  | A   | 5.40 ± 0.20 | abc   | A   | 6.12 ± 0.39 | ab  | A   |
|  | 4  | 33.29 ± 0.84 | efg  | A  | 3.50 ± 0.27  | fg   | AB  | 6.96 ± 0.11 | b   | A   | 5.03 ± 0.26 | abcde | ABC | 6.28 ± 0.17 | ab  | A   |
|  | 5  | 35.40 ± 0.95 | def  | A  | 5.75 ± 0.59  | ef   | AB  | 7.22 ± 0.45 | ab  | A   | 5.18 ± 0.05 | abcd  | D   | 4.98 ± 0.00 | ab  | A   |
|  | 6  | 36.21 ± 1.10 | cde  | A  | 6.88 ± 0.55  | de   | AB  | 7.48 ± 0.12 | ab  | ABC | 5.97 ± 0.20 | a     | AB  | 4.70 ± 0.55 | cd  | A   |
|  | 7  | 36.67 ± 0.97 | bcde | A  | 7.25 ± 0.73  | cde  | A   | 7.86 ± 0.14 | a   | AB  | 5.12 ± 0.18 | abcd  | D   | 4.62 ± 0.11 | cd  | A   |
|  | 9  | 38.29 ± 0.86 | abcd | A  | 8.75 ± 0.53  | bcd  | AB  | 7.85 ± 0.20 | a   | A   | 4.04 ± 0.14 | f     | C   | 4.26 ± 0.05 | d   | A   |
|  | 10 | 38.59 ± 0.83 | abcd | AB | 9.13 ± 0.58  | abcd | AB  | 7.26 ± 0.11 | ab  | AB  | 4.04 ± 0.16 | f     | C   | 4.44 ± 0.03 | d   | BC  |
|  | 11 | 39.45 ± 0.84 | abcd | A  | 9.75 ± 0.49  | abc  | A   | 7.61 ± 0.21 | ab  | A   | 4.30 ± 0.31 | def   | D   | 4.44 ± 0.30 | d   | A   |
|  | 12 | 39.51 ± 1.09 | abcd | A  | 9.88 ± 0.72  | abc  | A   | 7.82 ± 0.19 | a   | A   | 4.12 ± 0.33 | ef    | D   | 4.53 ± 0.16 | d   | A   |
|  | 13 | 41.54 ± 1.06 | a    | A  | 11.75 ± 0.75 | a    | A   | 7.45 ± 0.15 | ab  | A   | 4.01 ± 0.23 | f     | D   | 4.46 ± 0.04 | d   | A   |
|  | 14 | 40.92 ± 1.18 | ab   | A  | 11.25 ± 0.80 | ab   | AB  | 7.57 ± 0.22 | ab  | A   | 4.49 ± 0.09 | cdef  | F   | 4.29 ± 0.13 | d   | A   |
|  | 15 | 40.87 ± 0.89 | abc  | A  | 11.13 ± 0.61 | ab   | A   | 7.23 ± 0.05 | ab  | A   | 4.52 ± 0.19 | cdef  | E   | 4.69 ± 0.11 | abc | A   |
|  | 16 | 41.42 ± 0.98 | ab   | A  | 11.50 ± 0.71 | ab   | AB  | 7.04 ± 0.11 | ab  | CD  | 4.71 ± 0.12 | bcdef | F   | 4.42 ± 0.01 | d   | AB  |
|  | 1  | 29.77 ± 0.67 | e    | A  | 0.00 ± 0.00  |      |     | 7.25 ± 0.24 | ab  | A   | 5.74 ± 0.09 | bcde  | A   | 6.12 ± 0.17 | ab  | A   |
|  | 2  | 31.54 ± 0.43 | de   | A  | 1.71 ± 0.29  | f    | ABC | 7.29 ± 0.00 | ab  | A   | 5.78 ± 0.12 | bcde  | A   | 6.25 ± 0.18 | a   | A   |
|  | 3  | 33.25 ± 0.47 | cd   | A  | 3.43 ± 0.37  | ef   | AB  | 7.17 ± 0.07 | b   | A   | 5.15 ± 0.20 | def   | A   | 6.17 ± 0.14 | ab  | A   |
|  | 4  | 33.40 ± 0.37 | cd   | A  | 3.57 ± 0.30  | ef   | AB  | 7.20 ± 0.06 | ab  | A   | 6.06 ± 0.11 | bcd   | A   | 5.49 ± 0.03 | c   | B   |

|           |    |              |      |    |              |      |     |             |    |     |             |      |    |             |    |      |
|-----------|----|--------------|------|----|--------------|------|-----|-------------|----|-----|-------------|------|----|-------------|----|------|
|           | 5  | 35.64 ± 0.64 | bc   | A  | 5.86 ± 0.46  | de   | AB  | 7.27 ± 0.22 | ab | A   | 6.00 ± 0.11 | bcd  | BC | 5.04 ± 0.05 | a  | A    |
|           | 6  | 37.08 ± 0.59 | ab   | A  | 7.29 ± 0.57  | bcd  | AB  | 7.51 ± 0.17 | ab | ABC | 5.35 ± 0.03 | cdef | BC | 4.58 ± 0.23 | bc | A    |
|           | 7  | 37.39 ± 0.48 | ab   | A  | 7.57 ± 0.75  | abcd | A   | 7.42 ± 0.16 | ab | AB  | 7.22 ± 0.51 | a    | AB | 4.12 ± 0.18 | c  | ABCD |
|           | 9  | 37.77 ± 0.74 | ab   | A  | 8.00 ± 0.53  | abcd | AB  | 7.57 ± 0.16 | ab | A   | 4.60 ± 0.33 | ef   | BC | 4.46 ± 0.05 | bc | A    |
|           | 10 | 36.92 ± 0.69 | ab   | B  | 7.14 ± 0.51  | cd   | AB  | 7.43 ± 0.09 | ab | AB  | 4.20 ± 0.28 | f    | C  | 4.46 ± 0.09 | bc | ABC  |
|           | 11 | 38.10 ± 0.51 | ab   | A  | 8.29 ± 0.36  | abcd | A   | 7.93 ± 0.09 | ab | A   | 4.16 ± 0.25 | f    | D  | 4.40 ± 0.14 | bc | A    |
|           | 12 | 38.97 ± 0.44 | a    | A  | 9.14 ± 0.40  | abc  | AB  | 8.00 ± 0.01 | a  | A   | 6.17 ± 0.17 | bcd  | B  | 4.14 ± 0.13 | c  | AB   |
|           | 13 | 39.32 ± 0.87 | a    | A  | 9.57 ± 0.75  | abc  | AB  | 7.40 ± 0.22 | ab | A   | 6.41 ± 0.07 | abc  | B  | 4.16 ± 0.22 | c  | A    |
|           | 14 | 39.10 ± 0.51 | a    | A  | 9.29 ± 0.42  | abc  | AB  | 7.27 ± 0.38 | ab | A   | 6.48 ± 0.22 | ab   | CD | 4.33 ± 0.11 | bc | A    |
|           | 15 | 39.50 ± 0.65 | a    | A  | 9.71 ± 0.61  | ab   | AB  | 7.10 ± 0.23 | b  | A   | 6.40 ± 0.15 | abc  | C  | 4.36 ± 0.13 | bc | AB   |
|           | 16 | 39.78 ± 0.70 | a    | A  | 10.00 ± 0.44 | a    | AB  | 7.19 ± 0.13 | ab | B   | 6.26 ± 0.27 | abcd | CD | 4.06 ± 0.02 | c  | BC   |
|           | 1  | 29.09 ± 0.99 | e    | A  | 0.00 ± 0.00  |      |     | 7.18 ± 0.21 | ab | A   | 5.94 ± 0.31 | abc  | A  | 5.93 ± 0.16 | a  | A    |
|           | 2  | 31.88 ± 1.18 | de   | A  | 2.86 ± 0.46  | e    | AB  | 7.40 ± 0.10 | ab | A   | 4.35 ± 0.09 | de   | A  | 6.29 ± 0.10 | a  | A    |
|           | 3  | 33.35 ± 1.11 | cde  | A  | 4.29 ± 0.57  | de   | A   | 7.23 ± 0.09 | ab | A   | 4.29 ± 0.09 | e    | A  | 6.30 ± 0.01 | a  | A    |
|           | 4  | 33.86 ± 0.90 | bcde | A  | 4.71 ± 0.42  | de   | A   | 7.21 ± 0.09 | ab | A   | 4.10 ± 0.12 | e    | C  | 5.83 ± 0.16 | a  | AB   |
|           | 5  | 36.80 ± 1.13 | abcd | A  | 7.71 ± 0.57  | cd   | A   | 7.40 ± 0.29 | ab | A   | 4.40 ± 0.14 | de   | E  | 4.79 ± 0.27 | a  | A    |
|           | 6  | 37.63 ± 1.22 | abcd | A  | 8.57 ± 0.78  | abcd | A   | 7.35 ± 0.09 | ab | ABC | 5.16 ± 0.17 | cd   | CD | 4.62 ± 0.15 | bc | A    |
| LYC 50    | 7  | 37.40 ± 1.04 | abcd | A  | 8.29 ± 0.68  | abcd | A   | 7.72 ± 0.06 | ab | AB  | 5.92 ± 0.06 | abc  | CD | 3.93 ± 0.04 | c  | BCD  |
| +AOM +    | 9  | 38.68 ± 1.10 | abc  | A  | 9.57 ± 0.65  | abc  | A   | 7.52 ± 0.15 | ab | A   | 5.29 ± 0.13 | c    | B  | 4.30 ± 0.17 | bc | A    |
| DSS       | 10 | 38.80 ± 1.18 | abc  | AB | 9.71 ± 0.87  | abc  | AB  | 7.50 ± 0.12 | ab | AB  | 5.39 ± 0.12 | bc   | B  | 4.54 ± 0.10 | a  | AB   |
|           | 11 | 39.69 ± 1.48 | a    | A  | 10.71 ± 0.97 | abc  | A   | 7.45 ± 0.13 | ab | A   | 6.41 ± 0.31 | a    | B  | 4.42 ± 0.03 | bc | A    |
|           | 12 | 39.62 ± 1.28 | a    | A  | 10.57 ± 1.00 | abc  | A   | 7.95 ± 0.30 | a  | A   | 6.54 ± 0.22 | a    | B  | 4.28 ± 0.12 | bc | AB   |
|           | 13 | 39.62 ± 0.78 | ab   | A  | 10.43 ± 1.60 | abc  | AB  | 7.63 ± 0.11 | ab | A   | 6.62 ± 0.09 | a    | B  | 4.58 ± 0.02 | a  | A    |
|           | 14 | 40.74 ± 1.36 | a    | A  | 11.71 ± 1.04 | abc  | A   | 7.36 ± 0.22 | ab | A   | 6.58 ± 0.15 | a    | CD | 4.37 ± 0.06 | bc | A    |
|           | 15 | 41.77 ± 1.27 | a    | A  | 12.71 ± 0.89 | a    | A   | 7.01 ± 0.26 | b  | A   | 6.45 ± 0.22 | a    | C  | 4.53 ± 0.10 | a  | AB   |
|           | 16 | 41.19 ± 1.29 | a    | A  | 12.14 ± 1.08 | ab   | A   | 7.18 ± 0.16 | ab | B   | 6.20 ± 0.10 | ab   | CD | 3.99 ± 0.16 | c  | C    |
| Metformin | 1  | 29.29 ± 0.81 | f    | A  | 0.00 ± 0.00  |      |     | 7.12 ± 0.45 | b  | A   | 6.10 ± 0.23 | b    | A  | 6.07 ± 0.02 | a  | A    |
| + AOM +   | 2  | 31.05 ± 0.67 | ef   | A  | 1.71 ± 0.29  | e    | ABC | 7.19 ± 0.29 | ab | A   | 5.83 ± 0.12 | bc   | A  | 6.11 ± 0.33 | a  | A    |

|     |    |              |       |    |              |     |    |             |    |     |             |      |    |             |    |    |
|-----|----|--------------|-------|----|--------------|-----|----|-------------|----|-----|-------------|------|----|-------------|----|----|
| DSS | 3  | 32.67 ± 0.99 | def   | A  | 3.43 ± 0.30  | de  | AB | 7.08 ± 0.04 | b  | A   | 5.26 ± 0.09 | bcde | A  | 5.95 ± 0.01 | a  | A  |
|     | 4  | 33.15 ± 0.87 | cdef  | A  | 3.86 ± 0.34  | de  | AB | 7.11 ± 0.04 | b  | A   | 5.69 ± 0.17 | bcd  | AB | 5.84 ± 0.06 | a  | AB |
|     | 5  | 35.17 ± 0.81 | bcde  | A  | 5.86 ± 0.34  | cd  | AB | 7.09 ± 0.20 | b  | A   | 5.22 ± 0.04 | bcde | D  | 5.86 ± 0.23 | a  | A  |
|     | 6  | 36.27 ± 0.97 | abcde | A  | 7.00 ± 0.85  | bc  | AB | 7.32 ± 0.02 | ab | BC  | 4.48 ± 0.15 | e    | D  | 4.60 ± 0.29 | a  | A  |
|     | 7  | 36.33 ± 1.23 | abcd  | A  | 7.14 ± 0.77  | bc  | A  | 7.60 ± 0.07 | ab | AB  | 4.69 ± 0.25 | de   | D  | 3.65 ± 0.22 | b  | D  |
|     | 9  | 37.78 ± 0.67 | abc   | A  | 8.43 ± 0.57  | abc | AB | 7.45 ± 0.06 | ab | A   | 4.85 ± 0.40 | cde  | BC | 4.07 ± 0.04 | ab | A  |
|     | 10 | 37.58 ± 0.92 | abcd  | AB | 8.29 ± 0.78  | abc | AB | 7.79 ± 0.05 | a  | AB  | 4.78 ± 0.05 | de   | BC | 4.28 ± 0.14 | ab | BC |
|     | 11 | 37.55 ± 0.99 | abc   | A  | 8.29 ± 0.84  | abc | A  | 7.42 ± 0.07 | ab | A   | 5.25 ± 0.28 | bcde | CD | 4.19 ± 0.00 | ab | A  |
|     | 12 | 38.89 ± 0.89 | ab    | A  | 9.67 ± 0.99  | ab  | AB | 7.79 ± 0.02 | a  | A   | 5.83 ± 0.17 | bc   | BC | 4.16 ± 0.04 | ab | AB |
|     | 13 | 39.03 ± 1.01 | ab    | A  | 9.83 ± 0.40  | ab  | AB | 7.48 ± 0.09 | ab | A   | 5.97 ± 0.12 | bc   | BC | 4.34 ± 0.04 | ab | A  |
|     | 14 | 38.69 ± 1.05 | ab    | A  | 9.50 ± 0.67  | ab  | AB | 7.11 ± 0.08 | b  | A   | 7.82 ± 0.22 | a    | AB | 4.15 ± 0.03 | ab | A  |
|     | 15 | 39.65 ± 1.17 | a     | A  | 10.50 ± 0.62 | a   | AB | 7.08 ± 0.25 | b  | A   | 7.64 ± 0.05 | a    | B  | 4.16 ± 0.30 | a  | AB |
|     | 16 | 39.03 ± 1.01 | ab    | A  | 9.83 ± 0.95  | ab  | AB | 7.02 ± 0.25 | b  | CDE | 7.62 ± 0.33 | a    | B  | 3.97 ± 0.09 | b  | C  |

The analysis is in feces of mice fed *Bifidobacterium longum* microencapsulate. Values are mean ± SEM ( $n = 6-10$  animals per group). <sup>1</sup> µg phenolphthalein per hour per g feces. <sup>2</sup> Log CFU per g feces. Differences of means comparing the sixteen weeks inside each experimental group are expressed in lowercase letters. Each day is compared with the same day of the experimental group respective and differences of measure are expressed in capital letters. Values with different letter(s) within a column are significantly different (Tukey  $\alpha < 0.05$ ).

**Table 2.** Correlation between IGF-I, IGF-2, IGF-1R, IGFBPs protein expressions and intestinal parameters in AOM-DSS-treated mice.

| Variable/ Variable               | IGF-1 | IGF-2 | IGF-1R | IGF2BP1 | IGFBP2 | IGFBP3 |
|----------------------------------|-------|-------|--------|---------|--------|--------|
| Histopathological classification | 0.48  | 0.15  | 0.35   | 0.08    | 0.19   | -0.25  |
| Incidence of tumors              | 0.35  | 0.27  | 0.31   | 0.32    | 0.27   | -0.22  |
| Incidence of early lesions       | -0.02 | -0.14 | -0.04  | 0.03    | -0.22  | -0.07  |
| IGF-1                            | 1.00  | 0.44  | 0.63   | 0.42    | 0.38   | -0.20  |
| IGF-2                            | 0.44  | 1.00  | 0.30   | 0.43    | 0.33   | 0.09   |
| IGF-1R                           | 0.63  | 0.30  | 1.00   | 0.41    | 0.33   | -0.22  |
| IGF2BP1                          | 0.42  | 0.43  | 0.41   | 1.00    | 0.47   | 0.00   |
| IGFBP2                           | 0.38  | 0.33  | 0.33   | 0.47    | 1.00   | -0.05  |
| IGFBP3                           | -0.20 | 0.09  | -0.22  | 0.00    | -0.05  | 1.00   |
| pH caecum                        | 0.37  | 0.15  | 0.41   | 0.27    | 0.23   | -0.07  |
| pH colon                         | 0.24  | 0.15  | 0.19   | 0.39    | 0.18   | -0.01  |
| pH feces                         | 0.36  | 0.18  | 0.42   | 0.33    | 0.20   | -0.23  |
| $\beta$ -GA caecum               | 0.40  | 0.12  | 0.36   | 0.27    | 0.46   | -0.24  |
| $\beta$ -GA colon                | 0.38  | 0.13  | 0.34   | 0.40    | 0.43   | -0.16  |
| $\beta$ -GA feces                | 0.34  | 0.08  | 0.36   | 0.38    | 0.35   | -0.36  |
| Log UFC caecum (Luminal)         | -0.32 | 0.08  | -0.26  | -0.21   | -0.19  | 0.16   |
| Log UFC colon (Luminal)          | -0.12 | 0.01  | 0.00   | -0.03   | -0.29  | 0.14   |
| Log UFC caecum (Adherent)        | -0.32 | -0.08 | -0.24  | -0.23   | -0.26  | 0.09   |
| Log UFC colon (Adherent)         | -0.25 | 0.00  | -0.20  | -0.18   | -0.23  | 0.04   |
| Feces                            | -0.42 | -0.22 | -0.26  | -0.33   | -0.45  | 0.42   |

Correlation of Pearson. Red marked correlations are significant at  $p < 0.0500$ . Variable = 20.  $n = 63$  (6–10 animals per group).
